# Supplementary material
Source: PubMed Central journal article supplement (PMC5099073)
Supplement: NIHMS826315-supplement-supp__data.pdf [file NIHMS826315-supplement-supp__data.pdf]

**Supplementary Data**

Table S1. Segmental WSS<sub>peak</sub> distribution along the aortic circumference (segments 1 - 12) for each patient group and the three aortic levels S1 (sinutubular junction), S2 (mid-ascending aorta) and S3 (distal ascending aorta)

|                      | 1         | 2         | 3         | 4         | 5         | 6         | 7         | 8         | 9         | 10        | 11        | 12        |
|----------------------|-----------|-----------|-----------|-----------|-----------|-----------|-----------|-----------|-----------|-----------|-----------|-----------|
| <b>S1</b>            |           |           |           |           |           |           |           |           |           |           |           |           |
| <b>Controls</b>      | 0.9 ± 0.4 | 0.8 ± 0.3 | 0.8 ± 0.3 | 0.7 ± 0.3 | 0.7 ± 0.2 | 0.7 ± 0.3 | 0.7 ± 0.2 | 0.8 ± 0.2 | 0.7 ± 0.2 | 0.8 ± 0.3 | 0.9 ± 0.4 | 1.0 ± 0.5 |
| <b>Autograft</b>     | 0.5 ± 0.1 | 0.4 ± 0.1 | 0.4 ± 0.1 | 0.4 ± 0.1 | 0.5 ± 0.2 | 0.5 ± 0.1 | 0.4 ± 0.1 | 0.5 ± 0.2 | 0.5 ± 0.2 | 0.4 ± 0.1 | 0.5 ± 0.2 | 0.6 ± 0.2 |
| <b>Mechanical</b>    | 0.7 ± 0.4 | 0.8 ± 0.6 | 0.6 ± 0.4 | 0.7 ± 0.3 | 0.8 ± 0.4 | 0.9 ± 0.5 | 0.8 ± 0.4 | 0.8 ± 0.3 | 0.9 ± 0.3 | 0.9 ± 0.4 | 0.7 ± 0.3 | 0.6 ± 0.3 |
| <b>Stentless bio</b> | 0.6 ± 0.3 | 0.6 ± 0.4 | 0.5 ± 0.4 | 0.6 ± 0.3 | 0.6 ± 0.5 | 0.7 ± 0.4 | 0.6 ± 0.3 | 0.5 ± 0.4 | 0.6 ± 0.3 | 0.5 ± 0.3 | 0.5 ± 0.2 | 0.6 ± 0.2 |
| <b>Stented bio</b>   | 0.7 ± 0.4 | 0.7 ± 0.5 | 0.7 ±     | 0.7 ± 0.5 | 0.7 ± 0.5 | 0.7 ± 0.4 | 0.6 ± 0.3 | 0.6 ± 0.4 | 0.6 ± 0.3 | 0.6 ± 0.3 | 0.5 ± 0.3 | 0.6 ± 0.2 |
| <b>S2</b>            |           |           |           |           |           |           |           |           |           |           |           |           |
| <b>Controls</b>      | 0.8 ± 0.2 | 0.7 ± 0.2 | 0.7 ± 0.1 | 0.7 ± 0.2 | 0.9 ± 0.2 | 0.9 ± 0.3 | 0.9 ± 0.3 | 0.9 ± 0.4 | 0.9 ± 0.4 | 0.7 ± 0.2 | 0.9 ± 0.2 | 0.9 ± 0.2 |
| <b>Autograft</b>     | 0.6 ± 0.2 | 0.6 ± 0.2 | 0.6 ± 0.2 | 0.6 ± 0.3 | 0.6 ± 0.2 | 0.6 ± 0.1 | 0.6 ± 0.1 | 0.6 ± 0.1 | 0.6 ± 0.2 | 0.6 ± 0.1 | 0.5 ± 0.2 | 0.6 ± 0.3 |
| <b>Mechanical</b>    | 0.7 ± 0.4 | 0.9 ± 0.5 | 0.9 ± 0.5 | 0.7 ± 0.4 | 0.7 ± 0.3 | 0.7 ± 0.4 | 0.6 ± 0.2 | 0.6 ± 0.2 | 0.6 ± 0.2 | 0.6 ± 0.3 | 0.6 ± 0.3 | 0.7 ± 0.3 |
| <b>Stentless bio</b> | 1.1 ± 0.5 | 1.2 ± 0.5 | 1.3 ± 0.7 | 1.2 ± 0.6 | 1.0 ± 0.4 | 0.7 ± 0.3 | 0.6 ± 0.3 | 0.6 ± 0.3 | 0.7 ± 0.4 | 0.7 ± 0.4 | 0.7 ± 0.4 | 0.9 ± 0.4 |
| <b>Stented bio</b>   | 1.0 ± 0.4 | 1.2 ± 0.5 | 1.4 ± 0.7 | 1.4 ± 0.8 | 1.0 ± 0.6 | 0.7 ± 0.4 | 0.5 ± 0.4 | 0.6 ± 0.5 | 0.6 ± 0.4 | 0.6 ± 0.3 | 0.7 ± 0.3 | 0.8 ± 0.5 |
| <b>S3</b>            |           |           |           |           |           |           |           |           |           |           |           |           |
| <b>Controls</b>      | 0.7 ± 0.1 | 0.7 ± 0.2 | 0.8 ± 0.1 | 0.8 ± 0.2 | 0.9 ± 0.2 | 0.9 ± 0.3 | 0.9 ± 0.3 | 0.9 ± 0.3 | 0.8 ± 0.3 | 0.8 ± 0.1 | 0.7 ± 0.1 | 0.7 ± 0.1 |
| <b>Autograft</b>     | 0.6 ± 0.2 | 0.6 ± 0.2 | 0.6 ± 0.2 | 0.6 ± 0.3 | 0.5 ± 0.2 | 0.6 ± 0.3 | 0.6 ± 0.1 | 0.6 ± 0.3 | 0.6 ± 0.3 | 0.5 ± 0.2 | 0.5 ± 0.3 | 0.5 ± 0.2 |

|                      |           |           |           |           |           |           |           |           |           |           |           |           |
|----------------------|-----------|-----------|-----------|-----------|-----------|-----------|-----------|-----------|-----------|-----------|-----------|-----------|
| <b>Mechanical</b>    | 0.6 ± 0.3 | 0.7 ± 0.4 | 0.7 ± 0.4 | 0.6 ± 0.2 | 0.6 ± 0.2 | 0.7 ± 0.3 | 0.7 ± 0.3 | 0.7 ± 0.3 | 0.6 ± 0.3 | 0.7 ± 0.2 | 0.6 ± 0.2 | 0.5 ± 0.2 |
| <b>Stentless bio</b> | 0.9 ± 0.6 | 1.1 ± 0.5 | 1.1 ± 0.6 | 0.9 ± 0.4 | 0.8 ± 0.4 | 0.8 ± 0.4 | 0.8 ± 0.3 | 0.6 ± 0.3 | 0.6 ± 0.3 | 0.7 ± 0.4 | 0.6 ± 0.4 | 0.7 ± 0.4 |
| <b>Stented bio</b>   | 1.2 ± 0.7 | 1.1 ± 0.6 | 0.9 ± 0.5 | 0.8 ± 0.4 | 0.6 ± 0.3 | 0.6 ± 0.2 | 0.6 ± 0.3 | 0.6 ± 0.3 | 0.6 ± 0.3 | 0.7 ± 0.4 | 0.9 ± 0.6 | 1.0 ± 0.6 |

---

Table S2. Comparison of  $WSS_{peak}$  between groups. For each aortic segment (1-12) on each aortic level (S1-S3),  $WSS_{peak}$  was compared between all groups using a Kruskal-Wallis test. If this indicated significance, individual group-to-group tests by Mann-Whitney were performed. The table shows the p-values of these group-to-group tests and highlights the significant results (\*).

|                            | <b>Autograft</b> | <b>Mechanical</b> | <b>Stentless bio</b> | <b>Stented bio</b> |
|----------------------------|------------------|-------------------|----------------------|--------------------|
| <b>Level S1, Segment 7</b> |                  |                   |                      |                    |
| <b>Controls</b>            | 0.156            | 0.825             | 0.249                | 0.078              |
| <b>Autograft</b>           | ---              | 0.039 *           | 0.247                | 0.156              |
| <b>Mechanical</b>          | ---              | ---               | 0.248                | 0.208              |
| <b>Stentless bio</b>       | ---              | ---               | ---                  | 0.838              |
| <b>Level S1, Segment 8</b> |                  |                   |                      |                    |
| <b>Controls</b>            | 0.010 *          | 0.825             | 0.211                | 0.027 *            |
| <b>Autograft</b>           | ---              | 0.003 *           | 0.908                | 0.233              |
| <b>Mechanical</b>          | ---              | ---               | 0.102                | 0.010 *            |
| <b>Stentless bio</b>       | ---              | ---               | ---                  | 0.539              |
| <b>Level S1, Segment 9</b> |                  |                   |                      |                    |
| <b>Controls</b>            | 0.017 *          | 0.122             | 0.178                | 0.378              |
| <b>Autograft</b>           | ---              | 0.004 *           | 0.563                | 0.296              |
| <b>Mechanical</b>          | ---              | ---               | 0.102                | 0.038 *            |
| <b>Stentless bio</b>       | ---              | ---               | ---                  | 0.733              |
| <b>Level S2, Segment 2</b> |                  |                   |                      |                    |
| <b>Controls</b>            | 0.125            | 0.402             | 0.054                | 0.004 *            |
| <b>Autograft</b>           | ---              | 0.223             | 0.008 *              | 0.004 *            |
| <b>Mechanical</b>          | ---              | ---               | 0.290                | 0.166              |
| <b>Stentless bio</b>       | ---              | ---               | ---                  | 0.682              |
| <b>Level S2, Segment 3</b> |                  |                   |                      |                    |
| <b>Controls</b>            | 0.081            | 0.691             | 0.027 *              | 0.017 *            |
| <b>Autograft</b>           | ---              | 0.315             | 0.008 *              | 0.005 *            |
| <b>Mechanical</b>          | ---              | ---               | 0.211                | 0.089              |
| <b>Stentless bio</b>       | ---              | ---               | ---                  | 0.539              |

| <b>Level S2, Segment 4</b> |         |         |         |         |
|----------------------------|---------|---------|---------|---------|
| <b>Controls</b>            | 0.315   | 0.825   | 0.068   | 0.059   |
| <b>Autograft</b>           | ---     | 0.491   | 0.028 * | 0.030 * |
| <b>Mechanical</b>          | ---     | ---     | 0.054   | 0.068   |
| <b>Stentless bio</b>       | ---     | ---     | ---     | 0.682   |
| <b>Level S3, Segment 5</b> |         |         |         |         |
| <b>Controls</b>            | 0.004 * | 0.019 * | 0.564   | 0.006 * |
| <b>Autograft</b>           | ---     | 0.791   | 0.247   | 0.881   |
| <b>Mechanical</b>          | ---     | ---     | 0.441   | 0.378   |
| <b>Stentless bio</b>       | ---     | ---     | ---     | 0.335   |
| <b>Level S3, Segment 7</b> |         |         |         |         |
| <b>Controls</b>            | 0.007 * | 0.070   | 0.290   | 0.003 * |
| <b>Autograft</b>           | ---     | 0.958   | 0.355   | 0.263   |
| <b>Mechanical</b>          | ---     | ---     | 0.847   | 0.378   |
| <b>Stentless bio</b>       | ---     | ---     | ---     | 0.172   |

---
